# Supplementary material for: Assessment of effectiveness of DAMaN: A malaria intervention program initiated by Government of Odisha, India
Source: PubMed Central journal article supplement (PMC7478908; doi:10.1371/journal.pone.0238323), 2020-09-08
Supplement: pone.0238323.s001.pdf [file pone.0238323.s001.pdf]

**PART I**  
**HOUSEHOLD DETAILS**

|                                                                                                                                                                                                                                                                                                                                                                    |                                                                                              |
|--------------------------------------------------------------------------------------------------------------------------------------------------------------------------------------------------------------------------------------------------------------------------------------------------------------------------------------------------------------------|----------------------------------------------------------------------------------------------|
|                                                                                                                                                                                                                                                                                                                                                                    |                                                                                              |
| DISTRICT NAME _____ DISTRICT NO <input style="width: 30px;" type="text"/><br>BLOCK NAME _____ BLOCK NO <input style="width: 30px;" type="text"/><br>SUB CENTRE NAME _____ SUB CENTRE <input style="width: 30px;" type="text"/><br>HOUSEHOLD NO <input style="width: 20px;" type="text"/> <input style="width: 20px;" type="text"/><br>NAME OF HOUSEHOLD HEAD _____ |                                                                                              |
| GPS Coordinates      LAT <input style="width: 20px;" type="text"/> <input style="width: 20px;" type="text"/> LONG <input style="width: 20px;" type="text"/> <input style="width: 20px;" type="text"/>                                                                                                                                                              | GPS coordinates in units of decimal degree                                                   |
| TOTAL PERSONS IN THE HOUSEHOLD <input style="width: 30px;" type="text"/>                                                                                                                                                                                                                                                                                           |                                                                                              |
| CASTE <input style="width: 30px;" type="text"/><br><br>NAME OF THE TRIBE (If caste is ST) _____                                                                                                                                                                                                                                                                    | GENERAL=1<br>OBC=2<br>SC=3<br>ST=4<br><br>If 'CASTE' is ST, then write the name of the tribe |

**SECTION 1**

**INFORMATION ABOUT HOUSEHOLD MEMBERS**

| Individual Unique I.D | Name of the House Hold Members | Relationship with HH | Gender | Age *** | Education **** | Previous DAMaN Results |          |                          |            |                                                    | Hb (g/dl) * | Anthropometry** |         |           | RDT | Microscopy | PCR |
|-----------------------|--------------------------------|----------------------|--------|---------|----------------|------------------------|----------|--------------------------|------------|----------------------------------------------------|-------------|-----------------|---------|-----------|-----|------------|-----|
|                       |                                |                      |        |         |                | Test pos               | Test neg | Tested, Doesn't Remember | Not Tested | Verified by patient card Yes-1, No-0 Don't know-98 |             | Ht (cm)         | Wt (Kg) | MUAC (cm) |     |            |     |
|                       |                                |                      |        |         |                |                        |          |                          |            |                                                    |             |                 |         |           |     |            |     |
|                       |                                |                      |        |         |                |                        |          |                          |            |                                                    |             |                 |         |           |     |            |     |
|                       |                                |                      |        |         |                |                        |          |                          |            |                                                    |             |                 |         |           |     |            |     |
|                       |                                |                      |        |         |                |                        |          |                          |            |                                                    |             |                 |         |           |     |            |     |
|                       |                                |                      |        |         |                |                        |          |                          |            |                                                    |             |                 |         |           |     |            |     |
|                       |                                |                      |        |         |                |                        |          |                          |            |                                                    |             |                 |         |           |     |            |     |
|                       |                                |                      |        |         |                |                        |          |                          |            |                                                    |             |                 |         |           |     |            |     |
|                       |                                |                      |        |         |                |                        |          |                          |            |                                                    |             |                 |         |           |     |            |     |
|                       |                                |                      |        |         |                |                        |          |                          |            |                                                    |             |                 |         |           |     |            |     |
|                       |                                |                      |        |         |                |                        |          |                          |            |                                                    |             |                 |         |           |     |            |     |
|                       |                                |                      |        |         |                |                        |          |                          |            |                                                    |             |                 |         |           |     |            |     |
|                       |                                |                      |        |         |                |                        |          |                          |            |                                                    |             |                 |         |           |     |            |     |
|                       |                                |                      |        |         |                |                        |          |                          |            |                                                    |             |                 |         |           |     |            |     |

\*Hemoglobin(Hb) will be calculated for Under-5 children and Mother only

\*\*Anthropometry for Under-5 Children only

\*\*\*Record in completed months

\*\*\*\* Education in completed years

## SECTION 2

### SOCIO ECONOMIC CHARACTERISTICS

| No. | QUESTIONS AND FILTERS                                                                | CODING CATEGORIES                                                                                                                                                                                                         |    | INSTRUCTION |
|-----|--------------------------------------------------------------------------------------|---------------------------------------------------------------------------------------------------------------------------------------------------------------------------------------------------------------------------|----|-------------|
|     |                                                                                      | Yes                                                                                                                                                                                                                       | 1  |             |
| 1.  | Do you or your family own this dwelling?                                             | Yes                                                                                                                                                                                                                       | 1  |             |
|     |                                                                                      | No                                                                                                                                                                                                                        | 0  |             |
| 2.  | What is the main source of drinking water for members of your household?             | Piped water 1<br>Tube well or borehole..... 2<br><b>Dug well..... 3</b><br><b>Water from spring..... 4</b><br>Tanker truck.....5<br><br>Surface water (river/dam/<br>lake/pond/stream/canal/<br>Irrigation channel).....6 |    |             |
| 3.  | What does this household usually do to make the water safer to drink? Anything else? | Nothing.....1<br>Boil .....2<br>Use alum.....3<br><br>Add bleach/chlorinetablets.....4<br>Strain through a cloth.....5<br>Use water filter (ceramic/<br>Sand/composite/etc.).....6<br>Use electronic purifier.....7       |    | X           |
| 4.  | What kind of toilet facility does your household use?                                | FLUSH TOILET .....1<br><br>PIT TOILET LATRINE.....2<br><br>NO FACILITY` .....3                                                                                                                                            |    |             |
| 5.  | Does your household have / own:                                                      | YES                                                                                                                                                                                                                       | NO |             |
|     | Electricity?                                                                         | 1                                                                                                                                                                                                                         | 0  |             |
|     | A radio?                                                                             | 1                                                                                                                                                                                                                         | 0  |             |
|     | A television?                                                                        | 1                                                                                                                                                                                                                         | 0  |             |
|     | A mobile telephone?                                                                  | 1                                                                                                                                                                                                                         | 0  |             |
|     | A refrigerator?                                                                      | 1                                                                                                                                                                                                                         | 0  |             |
|     | Bank or post-office account?                                                         | 1                                                                                                                                                                                                                         | 0  |             |
|     | Bicycle?                                                                             | 1                                                                                                                                                                                                                         | 0  |             |
|     | Scooter/motorcycle?                                                                  | 1                                                                                                                                                                                                                         | 0  |             |
|     | Car/truck/tractor?                                                                   | 1                                                                                                                                                                                                                         | 0  |             |
|     | Separate room for cooking?                                                           | 1                                                                                                                                                                                                                         | 0  |             |
|     | Livestock (goats, cow, buffalo, bull, sheep, pig)?                                   | 1                                                                                                                                                                                                                         | 0  |             |
|     | Separate room for livestock                                                          | 1                                                                                                                                                                                                                         | 0  |             |

|    |                                                                         |                                                                                                                                                                                                                 |                                                                                                                                                                                                                                                                                                                                                                                                                             |
|----|-------------------------------------------------------------------------|-----------------------------------------------------------------------------------------------------------------------------------------------------------------------------------------------------------------|-----------------------------------------------------------------------------------------------------------------------------------------------------------------------------------------------------------------------------------------------------------------------------------------------------------------------------------------------------------------------------------------------------------------------------|
| 6. | WHAT TYPE OF FUEL DOES YOUR HOUSEHOLD<br><b>MAINLY</b> USE FOR COOKING? | 1 = Wood<br>2 = Coal, lignite<br>4 = Kerosene<br>5 = Charcoal<br>6 = Animal dung<br>7 = LPG/Natural gas<br>8 = Electricity<br>9 = Straw/shrubs/grass<br>10 = Agricultural crop<br>11 = Biogas<br>98= DON'T KNOW |                                                                                                                                                                                                                                                                                                                                                                                                                             |
| 7. | <b>MAIN</b> MATERIAL OF THE FLOOR.<br><br>RECORD OBSERVATION.           | 1=NATURAL<br><br>2=BASIC<br><br>3=FINISHED                                                                                                                                                                      | <b>NATURAL</b> =<br>Mud/clay/earth, Sand,<br>Dung<br><b>BASIC</b> =<br>Raw wood planks, Palm,<br>bamboo, Brick, Stone<br><b>FINISHED</b> =<br>Parquet, polished wood,<br>Vinyl, asphalt strips,<br>Ceramic tiles, Cement,<br>Carpet, Polished<br>stone/marble/granite                                                                                                                                                       |
| 8. | <b>MAIN</b> MATERIAL OF THE WALL.<br><br>RECORD OBSERVATION.            | 1=NATURAL<br><br>2=BASIC<br><br>3=FINISHED                                                                                                                                                                      | <b>NATURAL</b> =<br>No walls,<br>Cane/palm/trunks, Mud,<br>Grass/reeds/thatch<br><br><b>BASIC</b> = Bamboo with<br>mud, Stone with mud,<br>Plywood, Cardboard,<br>Unburnt brick,<br>Raw/reused wood<br><b>FINISHED</b> =<br>Cement/concrete, Stone<br>with lime/cement, Burnt<br>bricks, Cement blocks,<br>Wood planks/shingles,<br>GI/metal/asbestos<br>sheets                                                             |
| 9. | <b>MAIN</b> MATERIAL OF THE ROOF.<br><br>RECORD OBSERVATION.            | 1=NATURAL<br><br>2=BASIC<br><br>3=FINISHED                                                                                                                                                                      | <b>NATURAL</b> =<br>No roof, Thatch/palm<br>leaf<br>Mud, Sod/mud and grass<br>mixture,<br>Plastic/polythene<br>sheeting<br><br><b>BASIC</b> =<br>Rustic mat,<br>Palm/bamboo, Raw<br>wood planks/timber,<br>Unburnt bricks, Loosely<br>packed stone<br><br><b>FINISHED</b> =<br>Metal/GI, Wood,<br>Calamine/cement fiber,<br>Asbestos sheets,<br>RCC/RBC/cement/concr<br>ete, Roofing shingles,<br>Tiles, Slate, Burnt brick |

|     |                                                                                                                    |                                   |                      |                      |  |
|-----|--------------------------------------------------------------------------------------------------------------------|-----------------------------------|----------------------|----------------------|--|
| 10. | TYPE OF WINDOWS                                                                                                    |                                   | YES                  | NO                   |  |
|     | RECORD OBSERVATION.                                                                                                | WINDOWS WITH GLASS                | 1                    | 0                    |  |
|     |                                                                                                                    | WINDOWS WITH SCREENS              | 1                    | 0                    |  |
|     |                                                                                                                    | WINDOWS WITH CURTAINS OR SHUTTERS | 1                    | 0                    |  |
|     |                                                                                                                    | ANY OTHER VENTILATION             | 1                    | 0                    |  |
| 11. | HOW MANY ROOMS IN THIS HOUSEHOLD ARE USED FOR SLEEPING?<br>Include only rooms which are usually used for sleeping. | NUMBER OF SLEEPING ROOMS          | <input type="text"/> | <input type="text"/> |  |
| 12  | DOES THIS HOUSEHOLD HAVE A BPL CARD?                                                                               | Yes                               | 1                    |                      |  |
|     |                                                                                                                    | No                                | 0                    |                      |  |
| 13  | IS ANY USUAL MEMBER OF THIS HOUSEHOLD COVERED BY A HEALTH SCHEME OR HEALTH INSURANCE?                              | Yes                               | 1                    |                      |  |
|     |                                                                                                                    | No                                | 0                    |                      |  |

**SECTION 3**

**GENERAL MALARIA KNOWLEDGE / PRACTICES**

| NO. | QUESTIONS AND FILTERS                                                                                                            | CODING CATEGORIES                                                                                                                                                                                                                                                                                                                                                                                                                                                                   | Instructions data collection                                           | Instructions data entry                                                                                                                                                                                                                                                                                                                    |
|-----|----------------------------------------------------------------------------------------------------------------------------------|-------------------------------------------------------------------------------------------------------------------------------------------------------------------------------------------------------------------------------------------------------------------------------------------------------------------------------------------------------------------------------------------------------------------------------------------------------------------------------------|------------------------------------------------------------------------|--------------------------------------------------------------------------------------------------------------------------------------------------------------------------------------------------------------------------------------------------------------------------------------------------------------------------------------------|
| 14  | <p>CAN YOU TELL ME THE MAIN SIGNS OR SYMPTOMS OF MALARIA?</p> <p>MULTIPLE RESPONSES POSSIBLE<br/>PROBE ONCE (ANYTHING ELSE?)</p> | <p>FEVER.....<br/>CHILLS.....<br/>FEELING COLD.....<br/>HEADACHE.....<br/>NAUSEA AND VOMITING.....<br/>DIARRHEA.....<br/>DIZZINESS.....<br/>LOSS OF APPETITE.....<br/>BODY ACHE OR JOINT PAIN.....<br/>PALE EYES.....<br/>BODY WEAKNESS.....<br/>DON'T KNOW.....</p>                                                                                                                                                                                                                | <p>number to be given rank(s) as the answer(s) received</p>            | <p>There will be 5 variables with all the 14 possible values for each of them.</p> <p>The first ranked answer should be entered under the first variable. The second ranked answer will be entered under the second variable...so on. When any variable has NA or Don't Know as an answer all subsequent variables should be NA(empty)</p> |
| 15  | <p>IN YOUR OPINION, WHAT CAUSES MALARIA?</p> <p>MULTIPLE RESPONSES POSSIBLE<br/>PROBE ONCE (ANYTHING ELSE?)</p>                  | <p>MOSQUITO BITES.....<br/>EATING DIRTY FOOD.....<br/>DRINKING DIRTY WATER.....<br/>GETTING SOAKED WITH RAIN.....<br/>COLD OR CHANGING WEATHER.....<br/>CONTACT WITH SICK PERSON.....<br/>WITCHCRAFT.....<br/>ENVIRONMENT.....<br/>DON'T KNOW.....</p>                                                                                                                                                                                                                              | <p>All possible numbers to be given rank as the answer(s) received</p> | <p>There will be 5 rank variables with all the possible values for each of them.</p> <p>For rest refer question seven</p>                                                                                                                                                                                                                  |
| 16  | <p>HOW CAN SOMEONE PROTECT THEMSELVES AGAINST MALARIA?</p> <p>MULTIPLE RESPONSES POSSIBLE<br/>PROBE ONCE (ANYTHING ELSE?)</p>    | <p>SLEEP UNDER A MOSQUITO NET.....<br/>USE MOSQUITO REPELLANT.....<br/>COVERED CLOTHS.....<br/>TAKE PREVENTIVE MEDICATION.....<br/>SPRAY HOUSE WITH INSECTICIDE.....<br/>CUT GRASS BY THE HOUSE.....<br/>FILL IN PUDDLES (STAGNANT WATER).....<br/>KEEP HOUSE AREA CLEAN.....<br/>BURN LEAVES / CREATE SMOKE.....<br/>DON'T DRINK DIRTY WATER.....<br/>DON'T EAT BAD FOOD.....<br/>PUT SCREENS ON THE WINDOWS.....<br/>DON'T GET SOAKED WITH RAIN.....<br/><br/>DON'T KNOW.....</p> | <p>All possible numbers to be given rank as the answer(s) received</p> | <p>There will be 5 rank variables with 15 possible values for each of them.</p> <p>For rest refer question seven</p>                                                                                                                                                                                                                       |
| 17  | <p>HAVE YOU EVER HEARD OR SEEN ANY MESSAGES / INFORMATION ABOUT MALARIA?</p>                                                     | <p>YES.....1<br/>NO.....0</p>                                                                                                                                                                                                                                                                                                                                                                                                                                                       | <p>IF 'NO' SKIP 18,19,20</p>                                           |                                                                                                                                                                                                                                                                                                                                            |

|    |                                                                                                                                  |                                                                                                                                                                                                                                                                                     |                                                                                                  |                                                                                                              |
|----|----------------------------------------------------------------------------------------------------------------------------------|-------------------------------------------------------------------------------------------------------------------------------------------------------------------------------------------------------------------------------------------------------------------------------------|--------------------------------------------------------------------------------------------------|--------------------------------------------------------------------------------------------------------------|
| 18 | WHERE DID YOU SEE OR HEAR THESE MESSAGES/INFORMATION?<br>MULTIPLE RESPONSES POSSIBLE<br><br>PROBE ONCE (ANYTHING ELSE?)          | GOVERNMENT CLINIC/HOSPITAL.....<br>COMMUNITY HEALTH VOLUNTEER (ASHA/ASHA PLUS).....<br>FRIENDS/FAMILY.....<br>WORKPLACE.....<br>DRAMA GROUPS.....<br>POSTERS/BILLBOARDS.....<br>ON TV.....<br>ON THE RADIO.....<br>IN THE NEWSPAPER.....<br>DAMAN CAMPS.....<br><br>DON'T KNOW..... | All possible numbers to be given rank as the answer(s) received                                  | There will be 5 rank variables with 9 possible values for each of them.<br><br>For rest refer question seven |
| 19 | HOW LONG AGO DID YOU SEE OR HEAR THESE MESSAGES?                                                                                 | MONTHS <input type="text"/> <input type="text"/>                                                                                                                                                                                                                                    |                                                                                                  |                                                                                                              |
| 20 | WHAT TYPE OF MALARIA MESSAGES/INFORMATION DID YOU SEE OR HEAR?<br>MULTIPLE RESPONSES POSSIBLE<br><br>PROBE ONCE (ANYTHING ELSE?) | MALARIA IS DANGEROUS.....<br>MOSQUITOES SPREAD MALARIA.....<br>SLEEPING UNDER MOSQUITO NET IMPORTANT.....<br>SEEK TREATMENT FOR FEVER.....<br>IMPORTANCE OF HOUSE SPRAYING...<br>ENVIRONMENTAL SANITATION ACTIVITIES.....<br>DON'T KNOW.....                                        | All possible numbers to be given rank as the answer(s) received                                  | There will be 5 rank variables with 6 possible values for each of them.<br><br>For rest refer question seven |
| 21 | WHAT INSTANT ACTION DO YOU NEED TO TAKE IF SOMEONE SUFFERS FROM FEVER IN YOUR HOUSE?<br><br>(ONE CORRECT RESPONSE)               | DO NOT NEED ANY ACTION.....1<br>VISIT ASHA / MALARIA VOLUNTEER.....2<br>VISIT TO SC/MPHW.....3<br>VISIT TO PHC/CHC.....4<br>SDH/DHH/ MEICAL COLLEGE.....5<br>PRIVATE DRUG SELLING OUTLETS.....6<br>PRIVATE HOSPITALS.....7<br>INFORMAL PROVIDERS.....8<br>DON'T KNOW.....9          |                                                                                                  |                                                                                                              |
| 22 | HOW LONG AGO DID MALARIA MOST RECENTLY OCCUR IN YOUR HOUSEHOLD?<br>If During The Same Month Record '0'                           | RECORD IN MONTHS<br><input type="text"/>                                                                                                                                                                                                                                            | <b>IF "DIDN'T OCCUR"</b><br>THEN<br>WRITE<br>999.<br><b>IF "DON'T KNOW"</b><br>THEN<br>WRITE 998 |                                                                                                              |
| 23 | IS THERE A COMMUNITY HEALTH VOLUNTEER (ASHA/ MALARIA VOLUNTEER) IN YOUR VILLAGE?                                                 | YES.....1<br>NO.....0<br>DON'T KNOW.....98                                                                                                                                                                                                                                          | IF 'DON'T KNOW' OR 'NO' SKIP 24,25,28                                                            |                                                                                                              |
| 24 | IF YES, HAVE YOU EVER CONSULTED HER WHEN YOU OR A FAMILY MEMBER HAD A FEVER?                                                     | YES.....1<br>NO.....0<br>DON'T KNOW.....98                                                                                                                                                                                                                                          | IF 'DON'T KNOW' OR 'NO' SKIP 25                                                                  |                                                                                                              |
| 25 | IF YES, HOW LONG AGO?                                                                                                            | LESS THAN 3 MONTHS .....1<br>3-6 MONTHS AGO.....2<br>MORE THAN 6 MONTHS.....3<br>DON'T KNOW .....98                                                                                                                                                                                 |                                                                                                  |                                                                                                              |

|    |                                                                                                   |                                                                                     |  |  |
|----|---------------------------------------------------------------------------------------------------|-------------------------------------------------------------------------------------|--|--|
| 26 | HOW LONG DOES IT TAKE TO <b>TRAVEL</b> TO THE NEAREST GOVERNMENT HEALTH FACILITY                  | RECORD IN MINUTES<br><input type="text"/> <input type="text"/> <input type="text"/> |  |  |
| 27 | HOW LONG DOES IT TAKE TO <b>TRAVEL</b> TO THE CLOSEST PRIVATE CLINIC / DRUG SHOP/INFORMAL CLINIC? | RECORD IN MINUTES<br><input type="text"/> <input type="text"/> <input type="text"/> |  |  |
| 28 | HOW LONG DOES IT TAKE TO <b>WALK</b> TO THE ASHA/ MALARIA VOLUNTEER?                              | RECORD IN MINUTES<br><input type="text"/> <input type="text"/> <input type="text"/> |  |  |



**SECTION 4**

**VECTOR CONTROL**

| NO.                             | QUESTIONS AND FILTERS                                                                                        | CODING CATEGORIES                                                                                                                                                                                                                                                                                                                                                                                                                                                                                                                                                                                                                                                                                                                                                                                                                                                                                                                                                                                                                                                                                                                                                                                                                                                                                        | Instructions data collection         | Instructions data entry |  |  |      |        |    |        |    |                             |  |  |  |      |        |    |        |    |                              |  |  |  |      |        |    |        |    |  |  |
|---------------------------------|--------------------------------------------------------------------------------------------------------------|----------------------------------------------------------------------------------------------------------------------------------------------------------------------------------------------------------------------------------------------------------------------------------------------------------------------------------------------------------------------------------------------------------------------------------------------------------------------------------------------------------------------------------------------------------------------------------------------------------------------------------------------------------------------------------------------------------------------------------------------------------------------------------------------------------------------------------------------------------------------------------------------------------------------------------------------------------------------------------------------------------------------------------------------------------------------------------------------------------------------------------------------------------------------------------------------------------------------------------------------------------------------------------------------------------|--------------------------------------|-------------------------|--|--|------|--------|----|--------|----|-----------------------------|--|--|--|------|--------|----|--------|----|------------------------------|--|--|--|------|--------|----|--------|----|--|--|
| 29                              | At any time in the past 6 months, has anyone sprayed the interior walls of your dwelling against mosquitoes? | YES.....1<br>NO.....0<br>DON'T KNOW.....98                                                                                                                                                                                                                                                                                                                                                                                                                                                                                                                                                                                                                                                                                                                                                                                                                                                                                                                                                                                                                                                                                                                                                                                                                                                               | If 'NO' OR 'DON'T KNOW' then skip 30 |                         |  |  |      |        |    |        |    |                             |  |  |  |      |        |    |        |    |                              |  |  |  |      |        |    |        |    |  |  |
| 30                              | How many months ago was the house sprayed?<br>IF LESS THAN ONE MONTH, RECORD '0' MONTHS AGO.                 | MONTHS AGO..... <input type="text"/>                                                                                                                                                                                                                                                                                                                                                                                                                                                                                                                                                                                                                                                                                                                                                                                                                                                                                                                                                                                                                                                                                                                                                                                                                                                                     |                                      |                         |  |  |      |        |    |        |    |                             |  |  |  |      |        |    |        |    |                              |  |  |  |      |        |    |        |    |  |  |
| 31                              | Does your household have any mosquito nets?                                                                  | YES     1<br>NO       0                                                                                                                                                                                                                                                                                                                                                                                                                                                                                                                                                                                                                                                                                                                                                                                                                                                                                                                                                                                                                                                                                                                                                                                                                                                                                  | If 'NO' then skip 32 to 38           |                         |  |  |      |        |    |        |    |                             |  |  |  |      |        |    |        |    |                              |  |  |  |      |        |    |        |    |  |  |
| 32                              | How many mosquito nets does your household have?                                                             | Total NUMBER OF NETS <input type="text"/>                                                                                                                                                                                                                                                                                                                                                                                                                                                                                                                                                                                                                                                                                                                                                                                                                                                                                                                                                                                                                                                                                                                                                                                                                                                                |                                      |                         |  |  |      |        |    |        |    |                             |  |  |  |      |        |    |        |    |                              |  |  |  |      |        |    |        |    |  |  |
| 33                              | How many nets are?                                                                                           | <table border="1" style="width:100%; border-collapse: collapse;"> <tr> <td colspan="3" data-bbox="852 961 1133 1010">Supplied by any government body</td> <td data-bbox="1133 961 1273 1010"></td> </tr> <tr> <td data-bbox="852 1010 997 1100" rowspan="2">Size</td> <td data-bbox="997 1010 1133 1058">Single</td> <td data-bbox="1133 1010 1273 1058">a.</td> </tr> <tr> <td data-bbox="997 1058 1133 1100">Double</td> <td data-bbox="1133 1058 1273 1100">b.</td> </tr> <tr> <td colspan="3" data-bbox="852 1100 1133 1171">Self-purchased ever treated</td> <td data-bbox="1133 1100 1273 1171"></td> </tr> <tr> <td data-bbox="852 1171 997 1247" rowspan="2">Size</td> <td data-bbox="997 1171 1133 1211">Single</td> <td data-bbox="1133 1171 1273 1211">a.</td> </tr> <tr> <td data-bbox="997 1211 1133 1247">Double</td> <td data-bbox="1133 1211 1273 1247">b.</td> </tr> <tr> <td colspan="3" data-bbox="852 1247 1133 1318">Self-purchased never treated</td> <td data-bbox="1133 1247 1273 1318"></td> </tr> <tr> <td data-bbox="852 1318 997 1394" rowspan="2">Size</td> <td data-bbox="997 1318 1133 1358">Single</td> <td data-bbox="1133 1318 1273 1358">a.</td> </tr> <tr> <td data-bbox="997 1358 1133 1394">Double</td> <td data-bbox="1133 1358 1273 1394">b.</td> </tr> </table> | Supplied by any government body      |                         |  |  | Size | Single | a. | Double | b. | Self-purchased ever treated |  |  |  | Size | Single | a. | Double | b. | Self-purchased never treated |  |  |  | Size | Single | a. | Double | b. |  |  |
| Supplied by any government body |                                                                                                              |                                                                                                                                                                                                                                                                                                                                                                                                                                                                                                                                                                                                                                                                                                                                                                                                                                                                                                                                                                                                                                                                                                                                                                                                                                                                                                          |                                      |                         |  |  |      |        |    |        |    |                             |  |  |  |      |        |    |        |    |                              |  |  |  |      |        |    |        |    |  |  |
| Size                            | Single                                                                                                       | a.                                                                                                                                                                                                                                                                                                                                                                                                                                                                                                                                                                                                                                                                                                                                                                                                                                                                                                                                                                                                                                                                                                                                                                                                                                                                                                       |                                      |                         |  |  |      |        |    |        |    |                             |  |  |  |      |        |    |        |    |                              |  |  |  |      |        |    |        |    |  |  |
|                                 | Double                                                                                                       | b.                                                                                                                                                                                                                                                                                                                                                                                                                                                                                                                                                                                                                                                                                                                                                                                                                                                                                                                                                                                                                                                                                                                                                                                                                                                                                                       |                                      |                         |  |  |      |        |    |        |    |                             |  |  |  |      |        |    |        |    |                              |  |  |  |      |        |    |        |    |  |  |
| Self-purchased ever treated     |                                                                                                              |                                                                                                                                                                                                                                                                                                                                                                                                                                                                                                                                                                                                                                                                                                                                                                                                                                                                                                                                                                                                                                                                                                                                                                                                                                                                                                          |                                      |                         |  |  |      |        |    |        |    |                             |  |  |  |      |        |    |        |    |                              |  |  |  |      |        |    |        |    |  |  |
| Size                            | Single                                                                                                       | a.                                                                                                                                                                                                                                                                                                                                                                                                                                                                                                                                                                                                                                                                                                                                                                                                                                                                                                                                                                                                                                                                                                                                                                                                                                                                                                       |                                      |                         |  |  |      |        |    |        |    |                             |  |  |  |      |        |    |        |    |                              |  |  |  |      |        |    |        |    |  |  |
|                                 | Double                                                                                                       | b.                                                                                                                                                                                                                                                                                                                                                                                                                                                                                                                                                                                                                                                                                                                                                                                                                                                                                                                                                                                                                                                                                                                                                                                                                                                                                                       |                                      |                         |  |  |      |        |    |        |    |                             |  |  |  |      |        |    |        |    |                              |  |  |  |      |        |    |        |    |  |  |
| Self-purchased never treated    |                                                                                                              |                                                                                                                                                                                                                                                                                                                                                                                                                                                                                                                                                                                                                                                                                                                                                                                                                                                                                                                                                                                                                                                                                                                                                                                                                                                                                                          |                                      |                         |  |  |      |        |    |        |    |                             |  |  |  |      |        |    |        |    |                              |  |  |  |      |        |    |        |    |  |  |
| Size                            | Single                                                                                                       | a.                                                                                                                                                                                                                                                                                                                                                                                                                                                                                                                                                                                                                                                                                                                                                                                                                                                                                                                                                                                                                                                                                                                                                                                                                                                                                                       |                                      |                         |  |  |      |        |    |        |    |                             |  |  |  |      |        |    |        |    |                              |  |  |  |      |        |    |        |    |  |  |
|                                 | Double                                                                                                       | b.                                                                                                                                                                                                                                                                                                                                                                                                                                                                                                                                                                                                                                                                                                                                                                                                                                                                                                                                                                                                                                                                                                                                                                                                                                                                                                       |                                      |                         |  |  |      |        |    |        |    |                             |  |  |  |      |        |    |        |    |                              |  |  |  |      |        |    |        |    |  |  |
| 34.                             | If net were distributed in boarding school, did children bring it back during holidays?                      | YES.....1<br>NO.....0<br>NO CHILD IN SCHOOL.....2                                                                                                                                                                                                                                                                                                                                                                                                                                                                                                                                                                                                                                                                                                                                                                                                                                                                                                                                                                                                                                                                                                                                                                                                                                                        |                                      |                         |  |  |      |        |    |        |    |                             |  |  |  |      |        |    |        |    |                              |  |  |  |      |        |    |        |    |  |  |
| 35                              | How long ago did you obtain the newest net?                                                                  | MONTHS AGO, <input type="text"/>                                                                                                                                                                                                                                                                                                                                                                                                                                                                                                                                                                                                                                                                                                                                                                                                                                                                                                                                                                                                                                                                                                                                                                                                                                                                         |                                      |                         |  |  |      |        |    |        |    |                             |  |  |  |      |        |    |        |    |                              |  |  |  |      |        |    |        |    |  |  |

|                            |                                                                                                   |                                                                                                                                                                                                                                                                                                                  |                            |                                                              |                          |   |      |   |             |   |           |   |            |    |  |  |
|----------------------------|---------------------------------------------------------------------------------------------------|------------------------------------------------------------------------------------------------------------------------------------------------------------------------------------------------------------------------------------------------------------------------------------------------------------------|----------------------------|--------------------------------------------------------------|--------------------------|---|------|---|-------------|---|-----------|---|------------|----|--|--|
|                            |                                                                                                   |                                                                                                                                                                                                                                                                                                                  |                            |                                                              |                          |   |      |   |             |   |           |   |            |    |  |  |
| 36                         | Where did you obtain the newest net?                                                              | <table border="1"> <tr> <td>GOVERNMENT CLINIC/HOSPITAL</td> <td>1</td> </tr> <tr> <td>VILLAGE HEALTH COMMITTEE</td> <td>2</td> </tr> <tr> <td>ASHA</td> <td>3</td> </tr> <tr> <td>RETAIL SHOP</td> <td>4</td> </tr> <tr> <td>WORKPLACE</td> <td>5</td> </tr> <tr> <td>DON'T KNOW</td> <td>98</td> </tr> </table> | GOVERNMENT CLINIC/HOSPITAL | 1                                                            | VILLAGE HEALTH COMMITTEE | 2 | ASHA | 3 | RETAIL SHOP | 4 | WORKPLACE | 5 | DON'T KNOW | 98 |  |  |
| GOVERNMENT CLINIC/HOSPITAL | 1                                                                                                 |                                                                                                                                                                                                                                                                                                                  |                            |                                                              |                          |   |      |   |             |   |           |   |            |    |  |  |
| VILLAGE HEALTH COMMITTEE   | 2                                                                                                 |                                                                                                                                                                                                                                                                                                                  |                            |                                                              |                          |   |      |   |             |   |           |   |            |    |  |  |
| ASHA                       | 3                                                                                                 |                                                                                                                                                                                                                                                                                                                  |                            |                                                              |                          |   |      |   |             |   |           |   |            |    |  |  |
| RETAIL SHOP                | 4                                                                                                 |                                                                                                                                                                                                                                                                                                                  |                            |                                                              |                          |   |      |   |             |   |           |   |            |    |  |  |
| WORKPLACE                  | 5                                                                                                 |                                                                                                                                                                                                                                                                                                                  |                            |                                                              |                          |   |      |   |             |   |           |   |            |    |  |  |
| DON'T KNOW                 | 98                                                                                                |                                                                                                                                                                                                                                                                                                                  |                            |                                                              |                          |   |      |   |             |   |           |   |            |    |  |  |
| 37                         | A) How many pre- treated nets were received in the last 2 years?                                  | Number of nets <input type="text"/> <input type="text"/>                                                                                                                                                                                                                                                         |                            |                                                              |                          |   |      |   |             |   |           |   |            |    |  |  |
| 38                         | A. How many members of your household (including yourself) slept under a mosquito net last night? | Number of persons <input type="text"/> <input type="text"/>                                                                                                                                                                                                                                                      |                            | Should not be more than persons in the household. See page 2 |                          |   |      |   |             |   |           |   |            |    |  |  |
|                            | B. If not, why?                                                                                   | Insufficient Net.....1<br>Weather.....2<br>Unwillingness.....3<br>Slept outside.....4                                                                                                                                                                                                                            |                            |                                                              |                          |   |      |   |             |   |           |   |            |    |  |  |

**SECTION 5**

| NO. | QUESTIONS AND FILTERS                                                           | CODING CATEGORIES                                                                                                           |   | Instructions data collection | Instructions data entry |  |                                                              |
|-----|---------------------------------------------------------------------------------|-----------------------------------------------------------------------------------------------------------------------------|---|------------------------------|-------------------------|--|--------------------------------------------------------------|
| 39  | Has anyone in the family been ill with a fever at any time in the last 2 weeks? | YES                                                                                                                         | 1 | If 'NO' then go to section 6 |                         |  |                                                              |
|     |                                                                                 | NO                                                                                                                          | 0 |                              |                         |  |                                                              |
| 40  | If YES, how many people                                                         | <table border="1"><tr><td style="width: 20px; height: 20px;"></td><td style="width: 20px; height: 20px;"></td></tr></table> |   |                              |                         |  | Should not be more than persons in the household. See page 2 |
|     |                                                                                 |                                                                                                                             |   |                              |                         |  |                                                              |

**SECTION 6**  
**PREGNANT AND LACTATING MOTHER**

| SI no | QUESTIONS AND FILTERS                                      | CODING CATEGORIES |                                    |                                                                                  |                      | Instructions data collection                          |                                   |
|-------|------------------------------------------------------------|-------------------|------------------------------------|----------------------------------------------------------------------------------|----------------------|-------------------------------------------------------|-----------------------------------|
| 41    | Age at marriage (Record in years)                          |                   |                                    |                                                                                  |                      |                                                       |                                   |
| 42    | Number of Pregnancies identified including the present one |                   |                                    |                                                                                  |                      |                                                       |                                   |
| 43    | Detail of previous pregnancy (s)                           | S .<br>N<br>o     | Age At pregnancy (Record in years) | Outcome                                                                          | Birth weight (in Kg) | Hb at child birth (In g/dl)                           | Start from most distant pregnancy |
|       |                                                            | 1                 |                                    | 1.Live birth<br>2.Still birth<br>3.Medical Termination<br>4.Spontaneous Abortion |                      |                                                       |                                   |
|       |                                                            | 2                 |                                    | 1.Live birth<br>2.Still birth<br>3.Medical Termination<br>4.Spontaneous Abortion |                      |                                                       |                                   |
|       |                                                            | 3                 |                                    | 1.Live birth<br>2.Still birth<br>3.Medical Termination<br>4.Spontaneous Abortion |                      |                                                       |                                   |
|       |                                                            | 4                 |                                    | 1.Live birth<br>2.Still birth<br>3.Medical Termination<br>4.Spontaneous Abortion |                      |                                                       |                                   |
| 44    | Current Pregnancy history                                  | Lactating mother  |                                    | Date of delivery                                                                 |                      |                                                       |                                   |
|       |                                                            | Pregnant Mother   |                                    | Expected date of delivery                                                        |                      |                                                       |                                   |
|       |                                                            |                   |                                    | Date of last menstruation                                                        |                      |                                                       |                                   |
| 45    | Age at first childbirth (record in Years)                  |                   |                                    |                                                                                  |                      | Enter data both in case of live birth and still birth |                                   |
| 46    | History of diseases suffered in the past                   |                   |                                    |                                                                                  |                      |                                                       |                                   |

**Follow up of the current pregnancy:**

| 47 | Outcome of pregnancy, including the current one: | S. No | Age | Live birth | Still birth | Medical Termination Of Pregnancy | Spontaneous Abortion | Birth weight | Hb of mother at child birth | Instructions data collection             |
|----|--------------------------------------------------|-------|-----|------------|-------------|----------------------------------|----------------------|--------------|-----------------------------|------------------------------------------|
|    |                                                  | 1.    |     |            |             |                                  |                      |              |                             | In case of twins, fill up both the rows. |
|    |                                                  | 2.    |     |            |             |                                  |                      |              |                             |                                          |

48. Contact details for follow up

| Name              | Phone Number |
|-------------------|--------------|
| HEAD OF THE HOUSE |              |
| ASHA              |              |
| ANGANWADI         |              |
